# Supplementary material
Source: PubMed Central journal article supplement (PMC3002248)

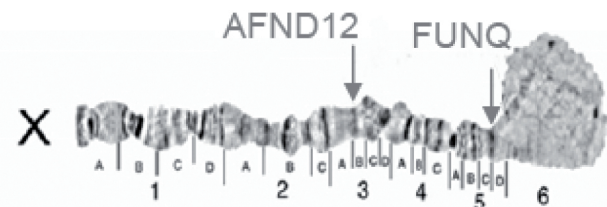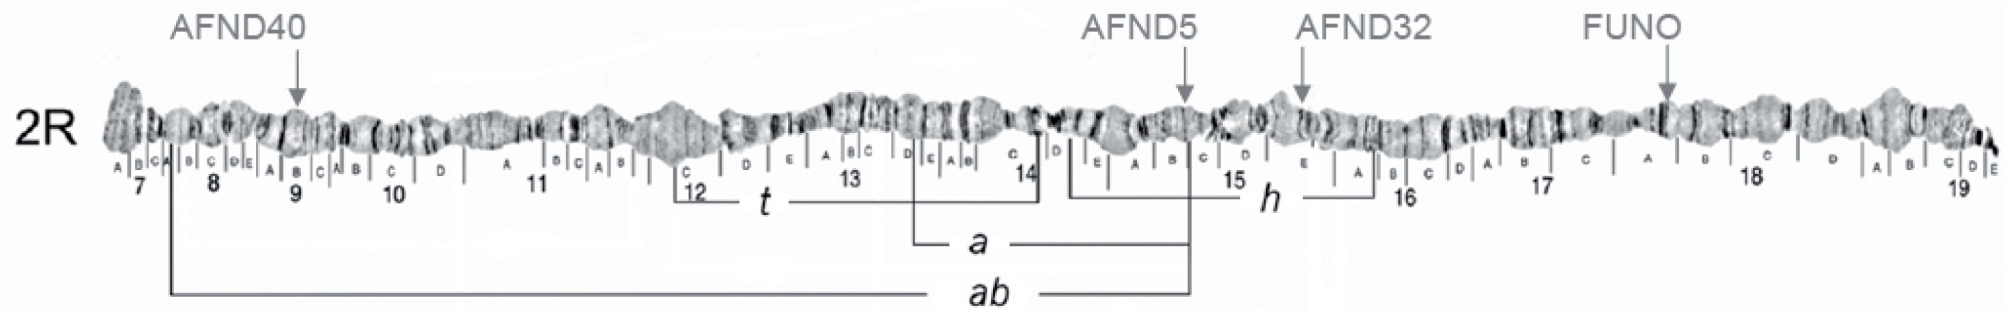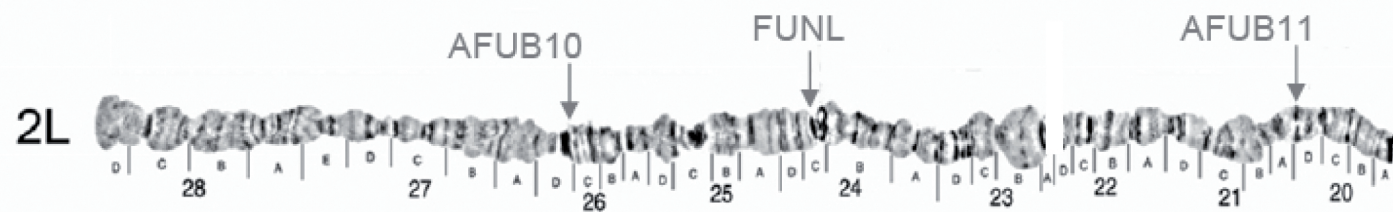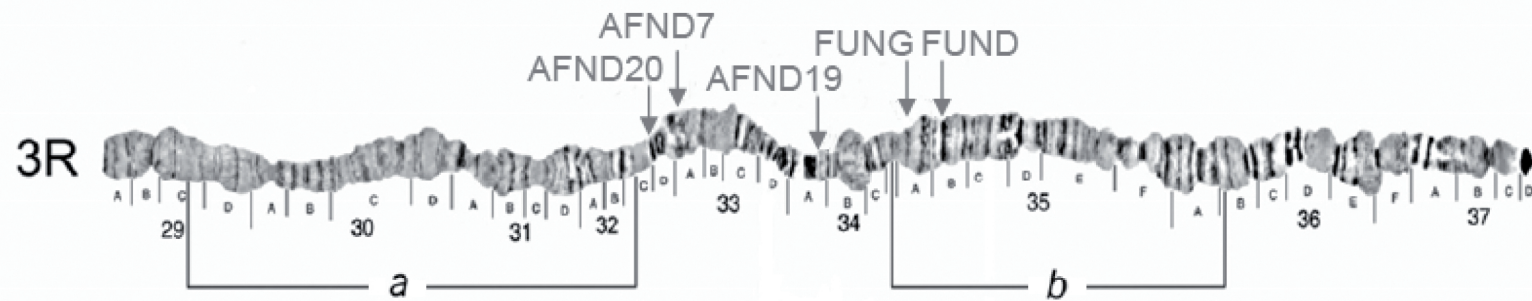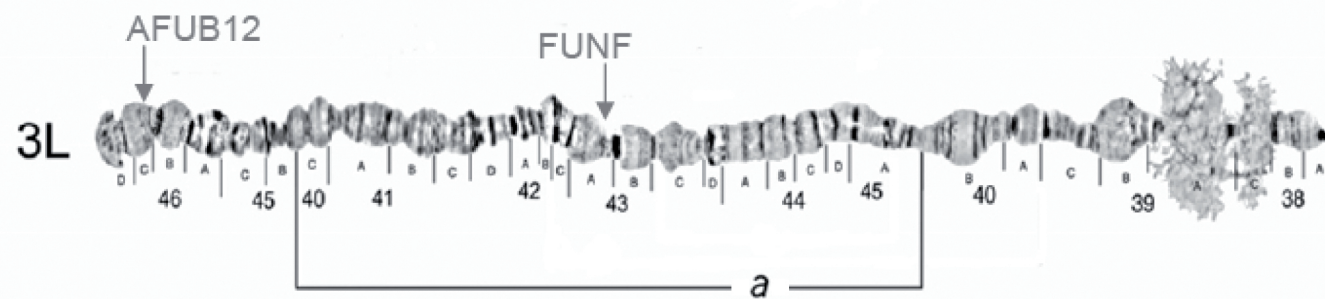

Supplement: supp_msq248_mbe-09-0393-File005.pdf [file supp_msq248_mbe-09-0393-File005.pdf]

**A**

|          | $\ln P(K X)$     | $P(K X)$    |
|----------|------------------|-------------|
| <b>1</b> | <b>-15469.94</b> | <b>1.00</b> |
| 2        | -15570.16        | 0.00        |
| 3        | -15606.04        | 0.00        |
| 4        | -15776.28        | 0.00        |
| 5        | -15988.82        | 0.00        |
| 6        | -16072.5         | 0.00        |
| 7        | -16212.38        | 0.00        |
| 8        | -16184.38        | 0.00        |
| 9        | -16179.8         | 0.00        |
| 10       | -16278.84        | 0.00        |
| 11       | -16428.06        | 0.00        |
| 12       | -16531.02        | 0.00        |

**B**

|          | $\ln P(K X)$    | $P(K X)$    |
|----------|-----------------|-------------|
| 1        | -1935.4         | 0.00        |
| 2        | -1265.74        | 0.00        |
| 3        | -1077.74        | 0.00        |
| <b>4</b> | <b>-1037.54</b> | <b>0.83</b> |
| 5        | -1144.64        | 0.00        |
| 6        | -1039.14        | 0.17        |
| 7        | -1055.32        | 0.00        |
| 8        | -1080.46        | 0.00        |
| 9        | -1098.98        | 0.00        |
| 10       | -1099.12        | 0.00        |
| 11       | -1130.38        | 0.00        |
| 12       | -1124.6         | 0.00        |

**C**

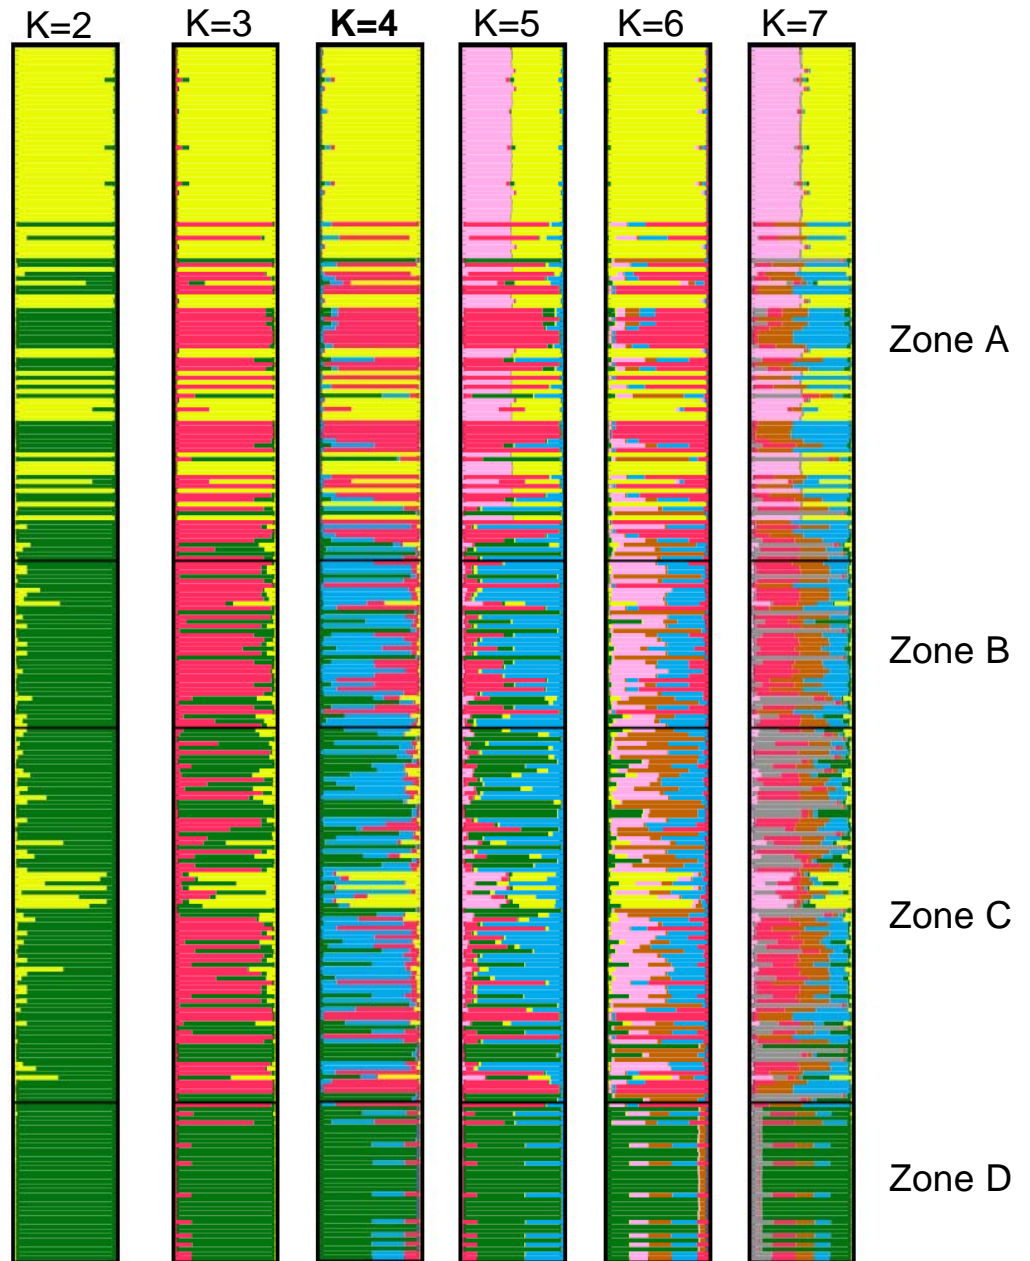

Supplement: supp_msq248_mbe-09-0393-File006.pdf [file supp_msq248_mbe-09-0393-File006.pdf]
